# Supplementary material
Source: ML conference proceedings conference paper supplement (https://openreview.net/forum?id=drmIBh6v2U)

Estimated MR

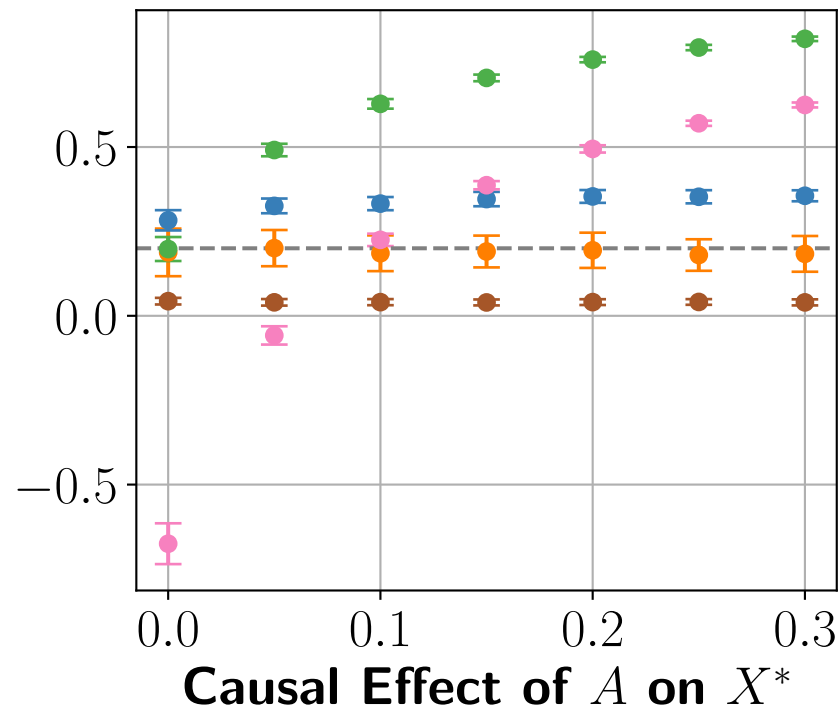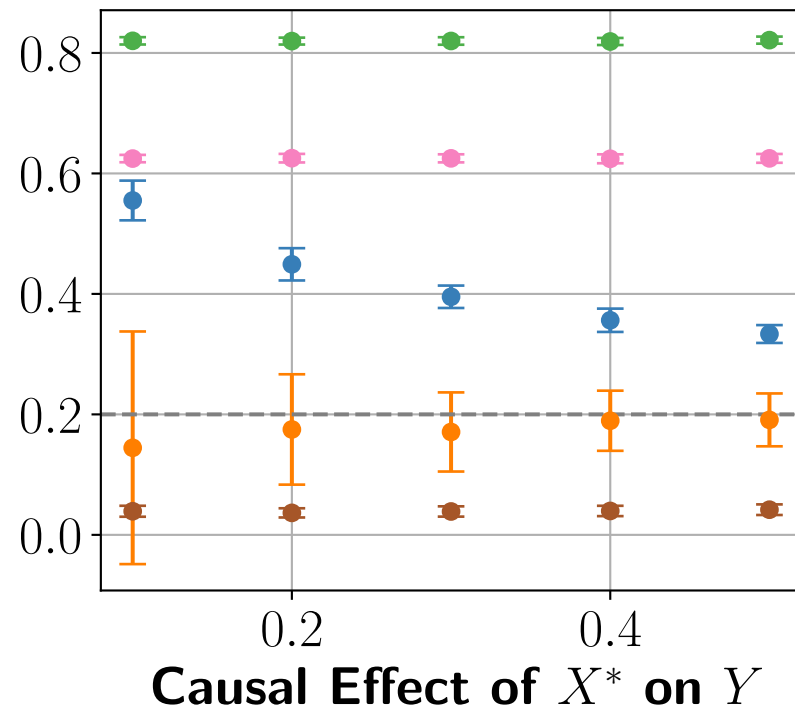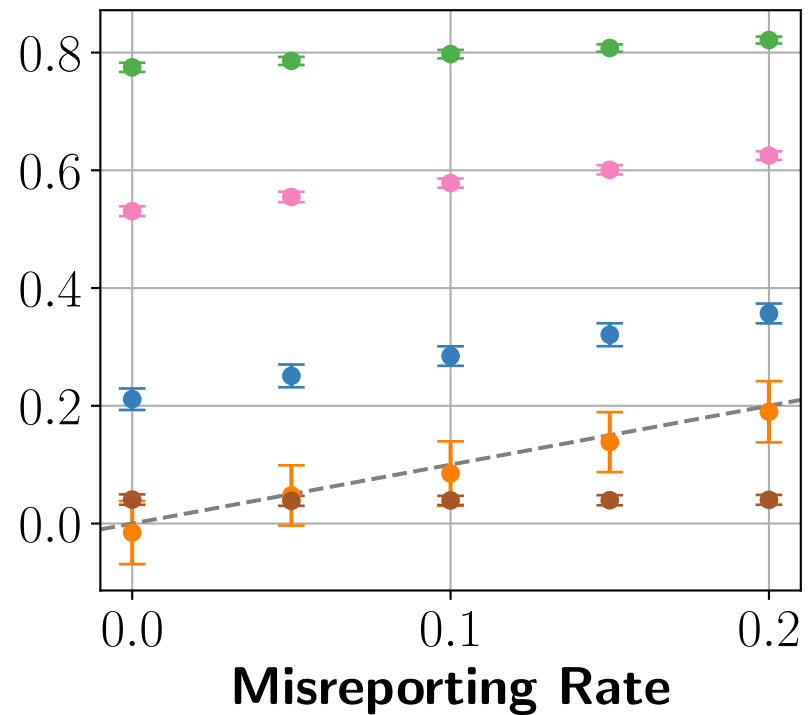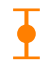

CMRE (Ours)

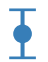

NMRE

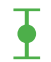

NDEE (All)

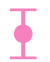

NDEE (no S)

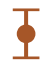

OCSVM

Supplement: supplementary_material [file simulation_1_appendix_plot.pdf › results/results_experiment_1/simulation_1_appendix_plot.pdf]

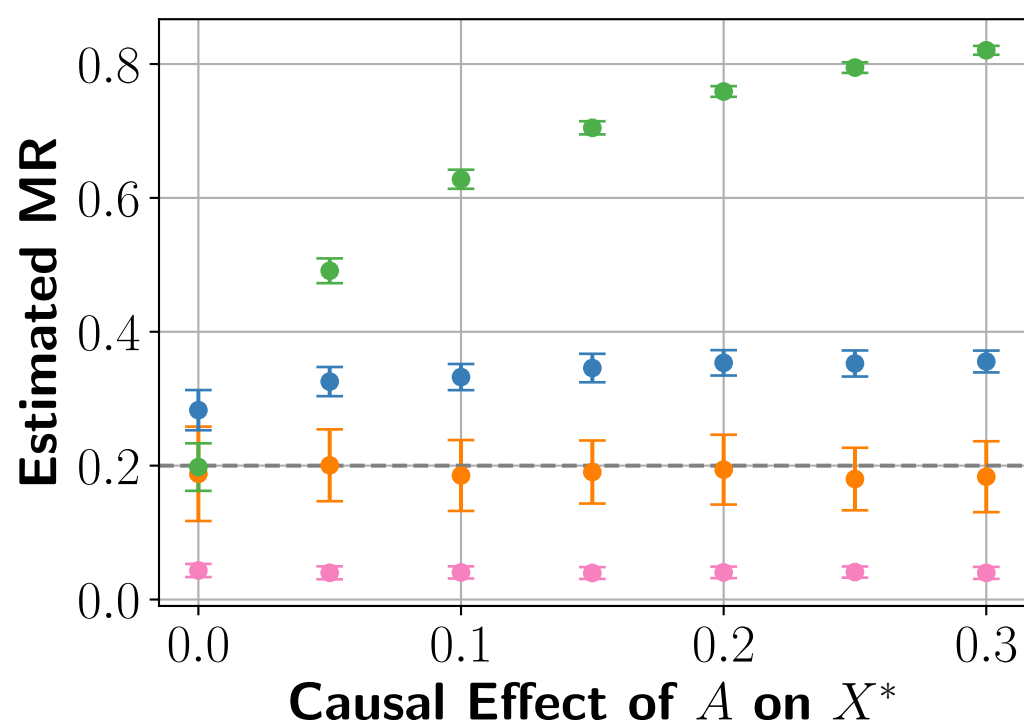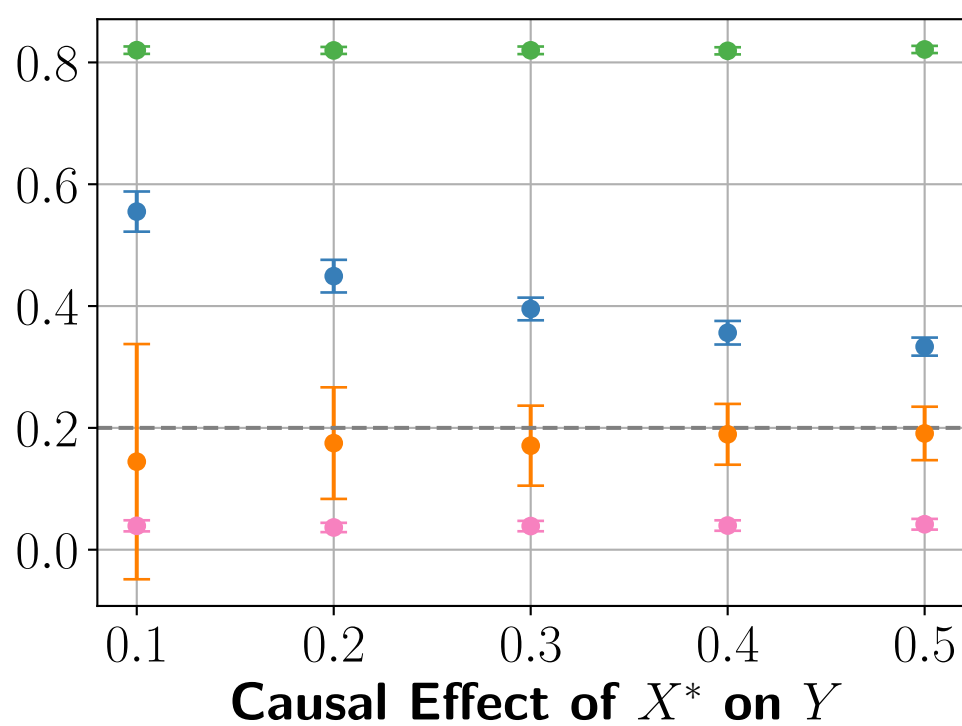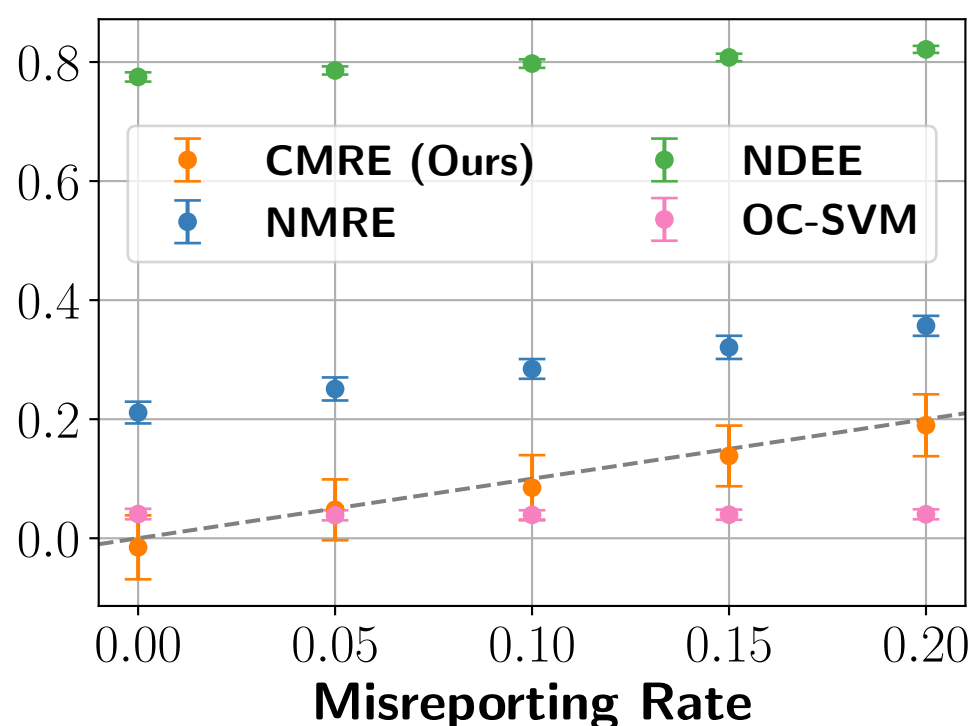

Supplement: supplementary_material [file simulation_1_main_plot.pdf › results/results_experiment_1/simulation_1_main_plot.pdf]

Estimated MR

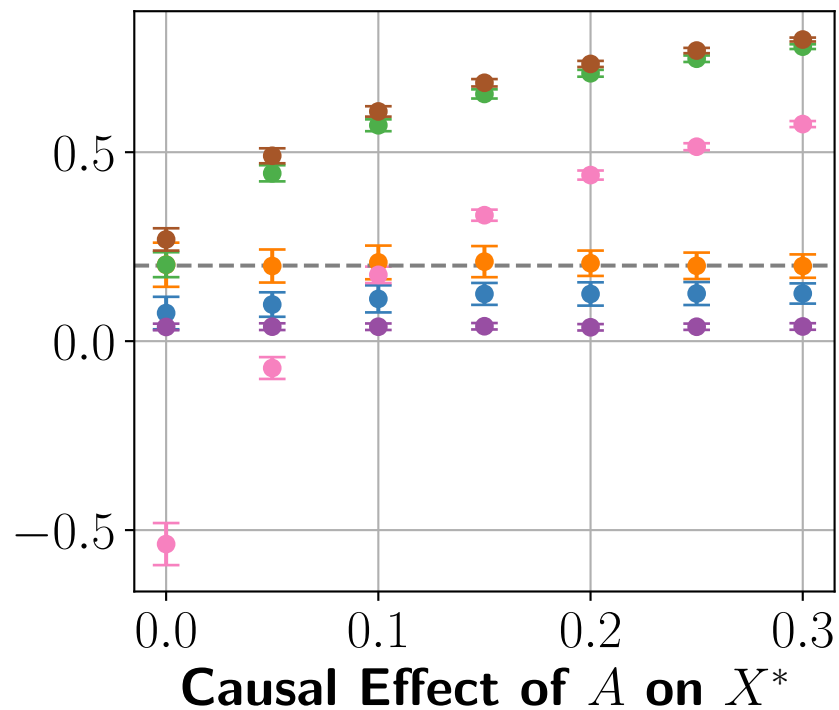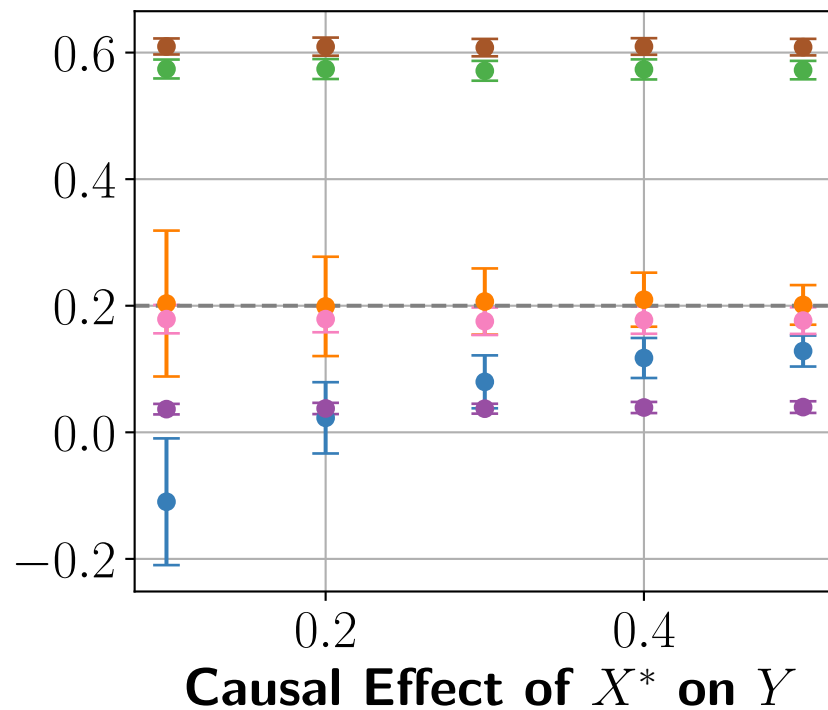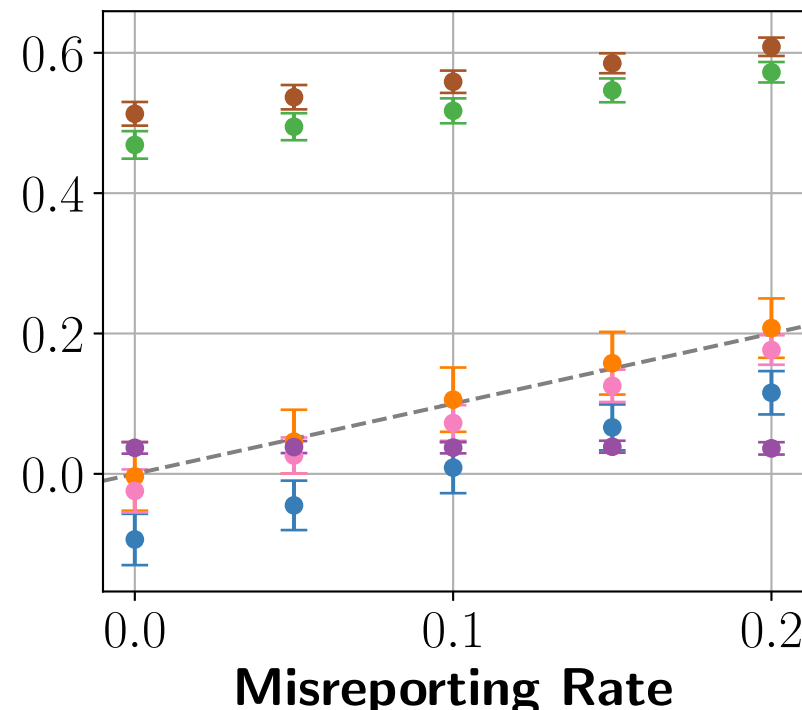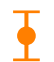

CMRE (Ours)

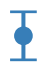

NMRE

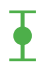

NDEE (All)

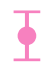

NDEE (no S)

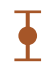

NDEE (no C)

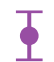

OCSVM

Supplement: supplementary_material [file simulation_2_appendix_plot.pdf › results/results_experiment_2/simulation_2_appendix_plot.pdf]

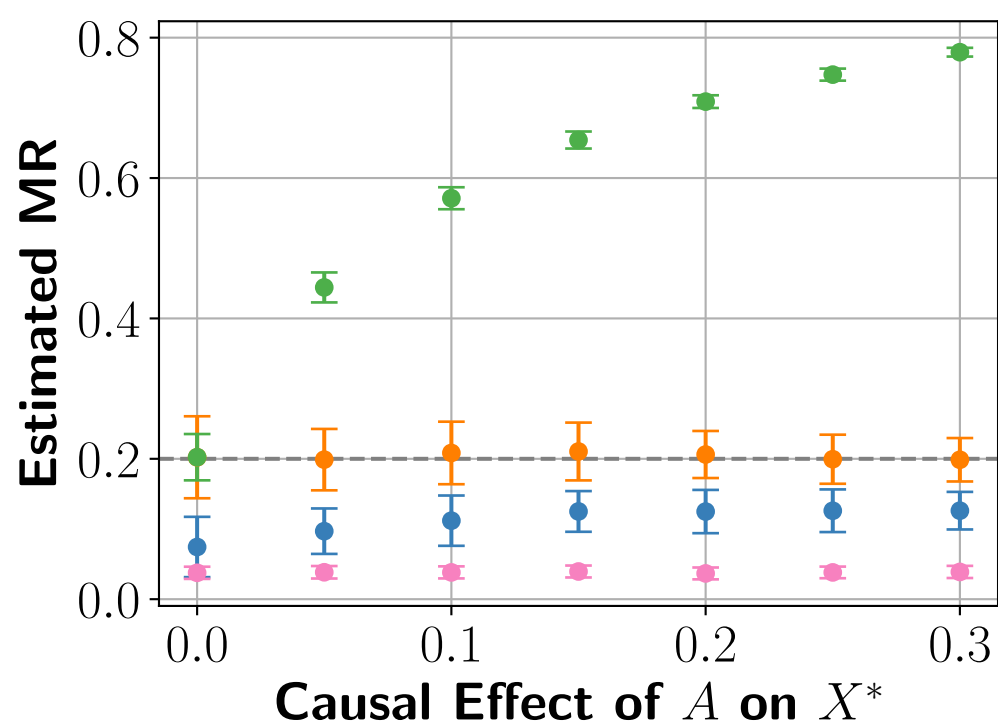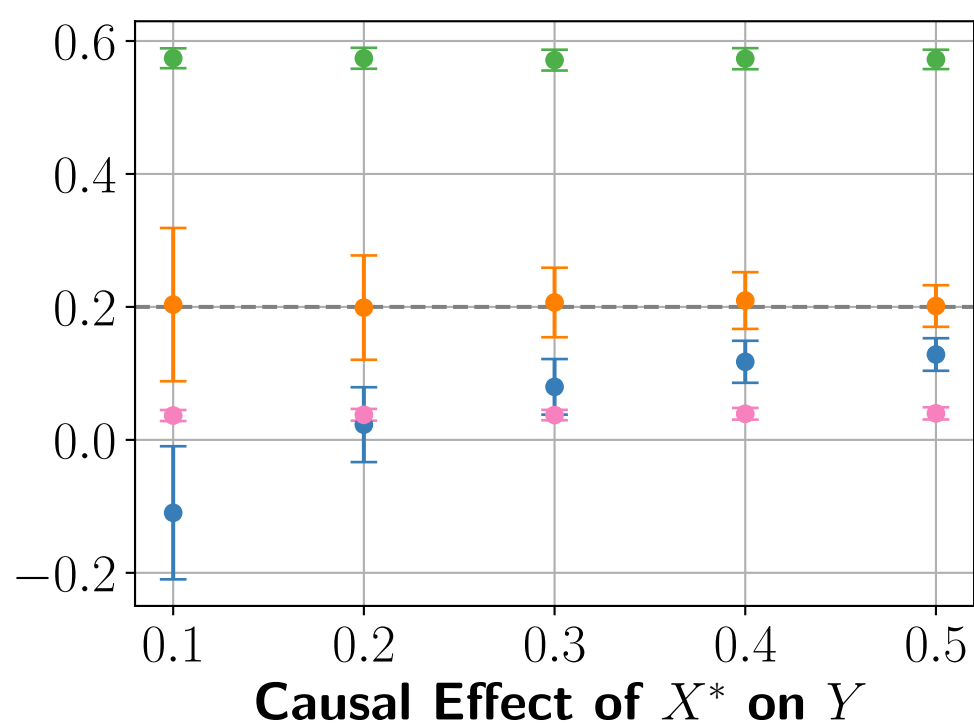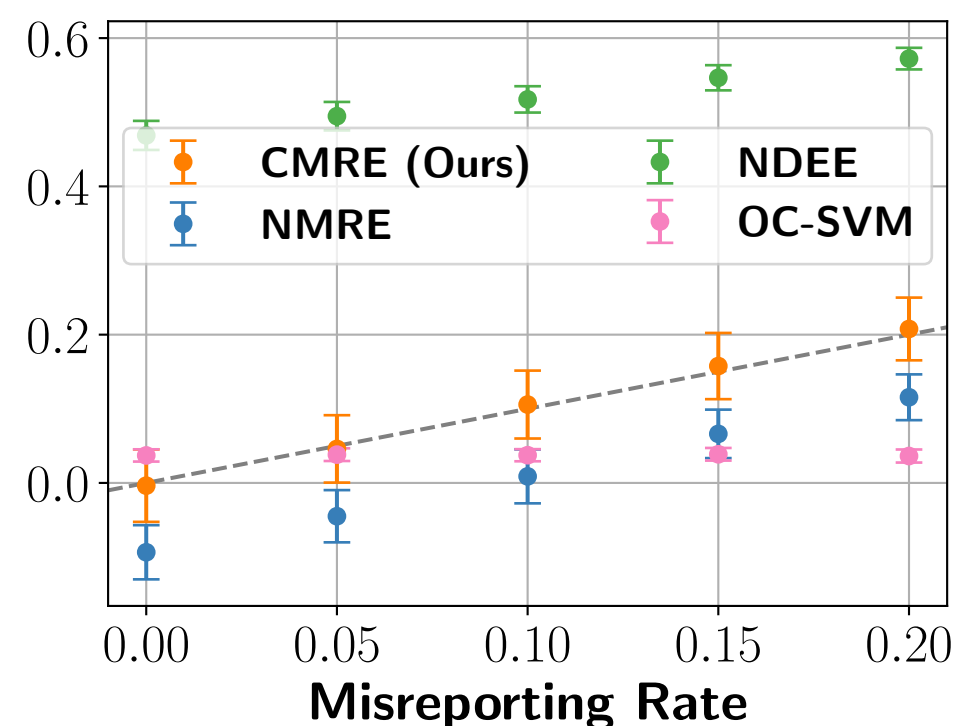

Supplement: supplementary_material [file simulation_2_main_plot.pdf › results/results_experiment_2/simulation_2_main_plot.pdf]

Estimated MR

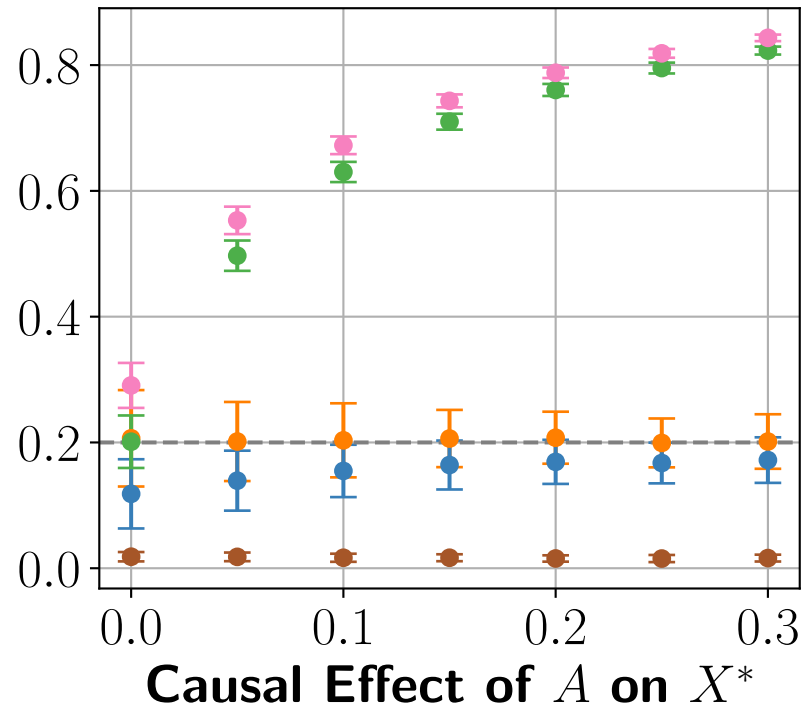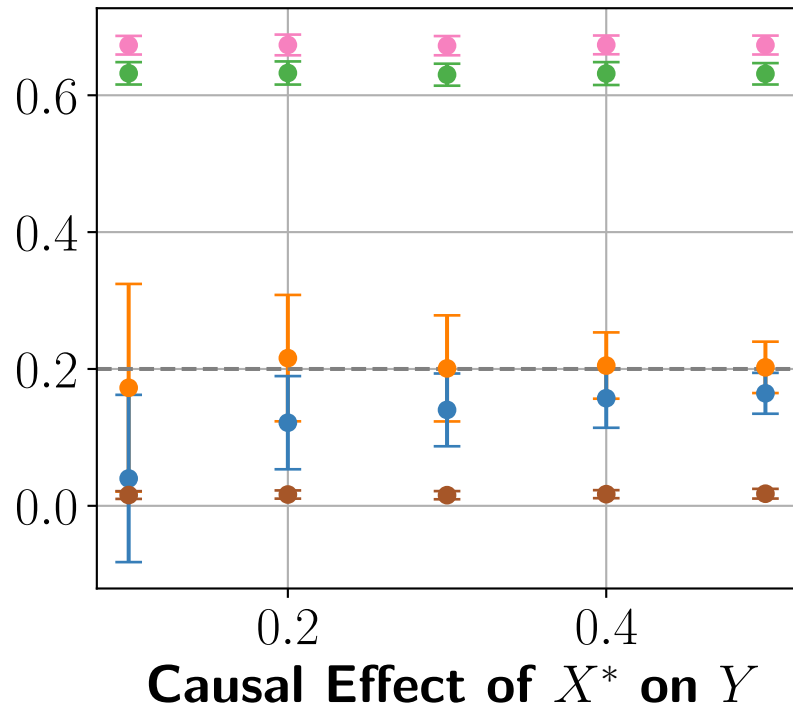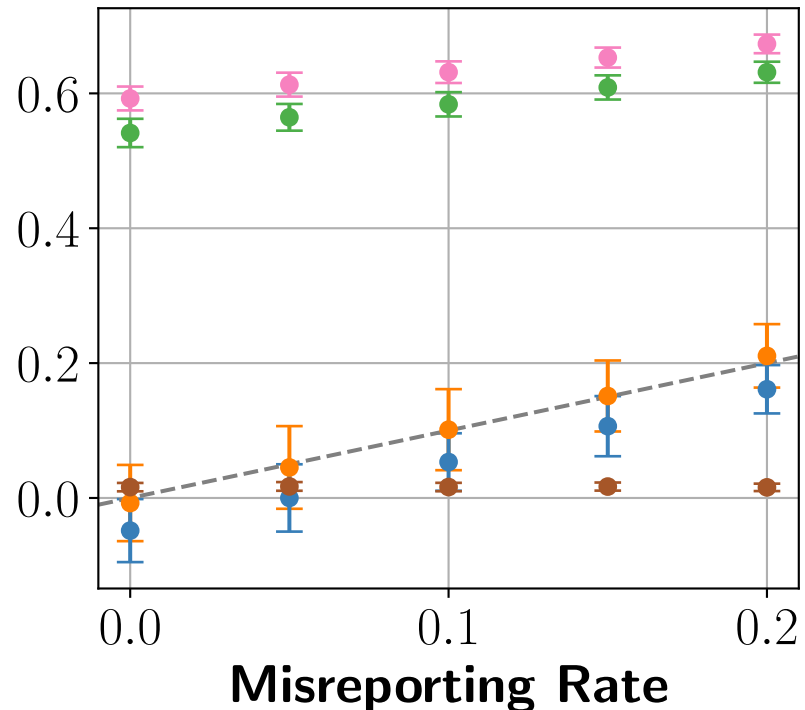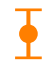

CMRE (Ours)

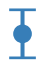

NMRE

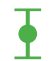

NDEE (All)

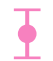

NDEE (no C)

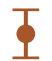

OCSVM

Supplement: supplementary_material [file simulation_3_appendix_plot.pdf › results/results_experiment_3/simulation_3_appendix_plot.pdf]

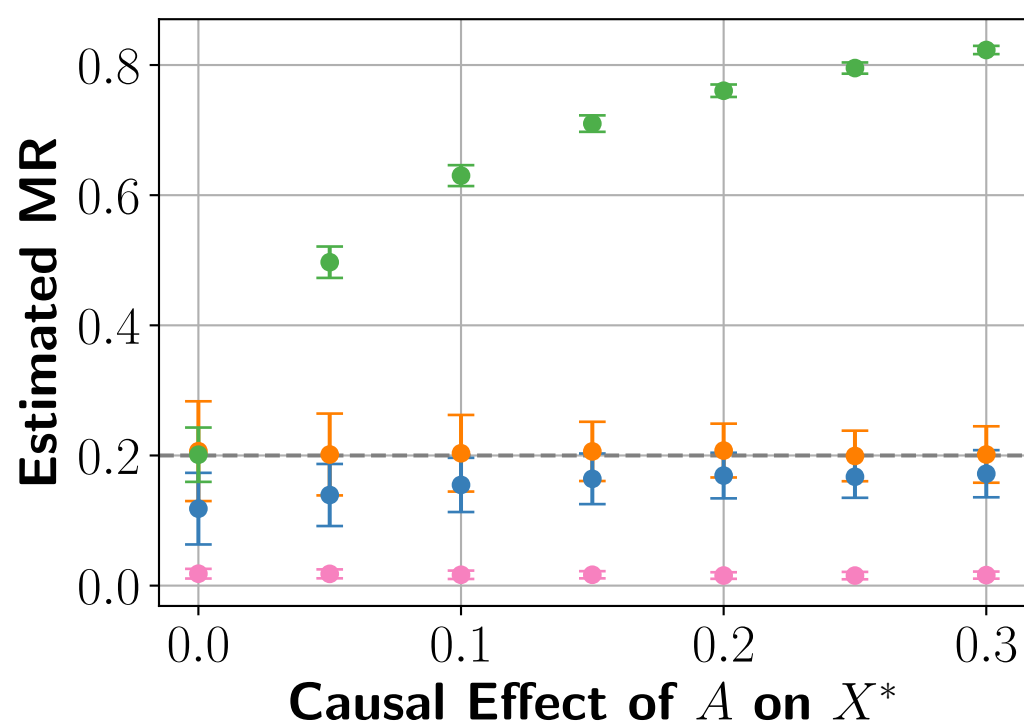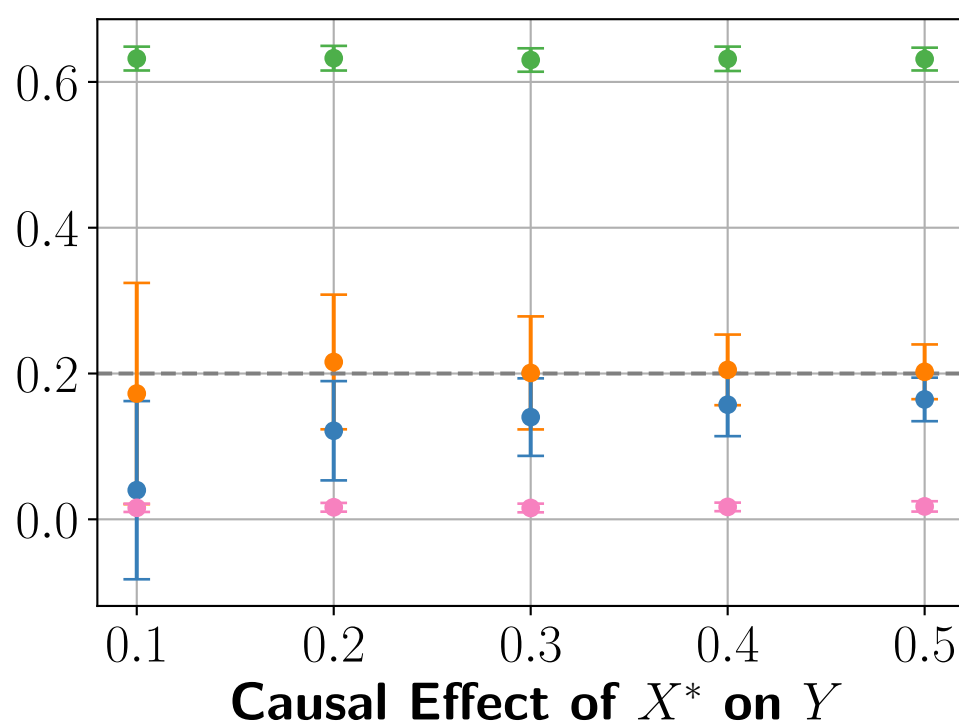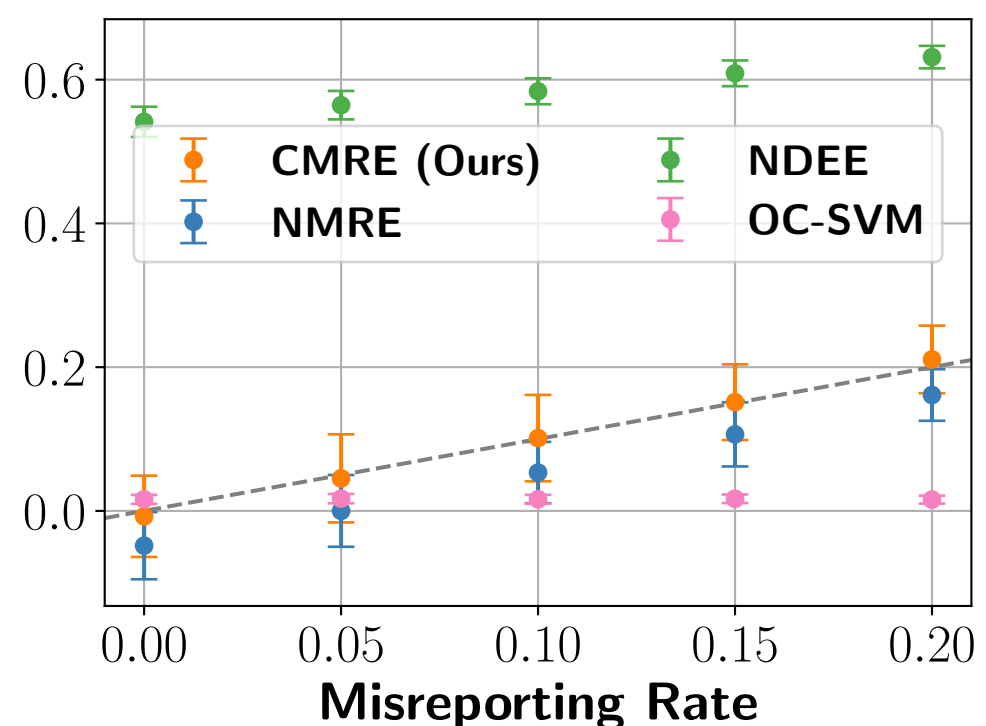

Supplement: supplementary_material [file simulation_3_main_plot.pdf › results/results_experiment_3/simulation_3_main_plot.pdf]

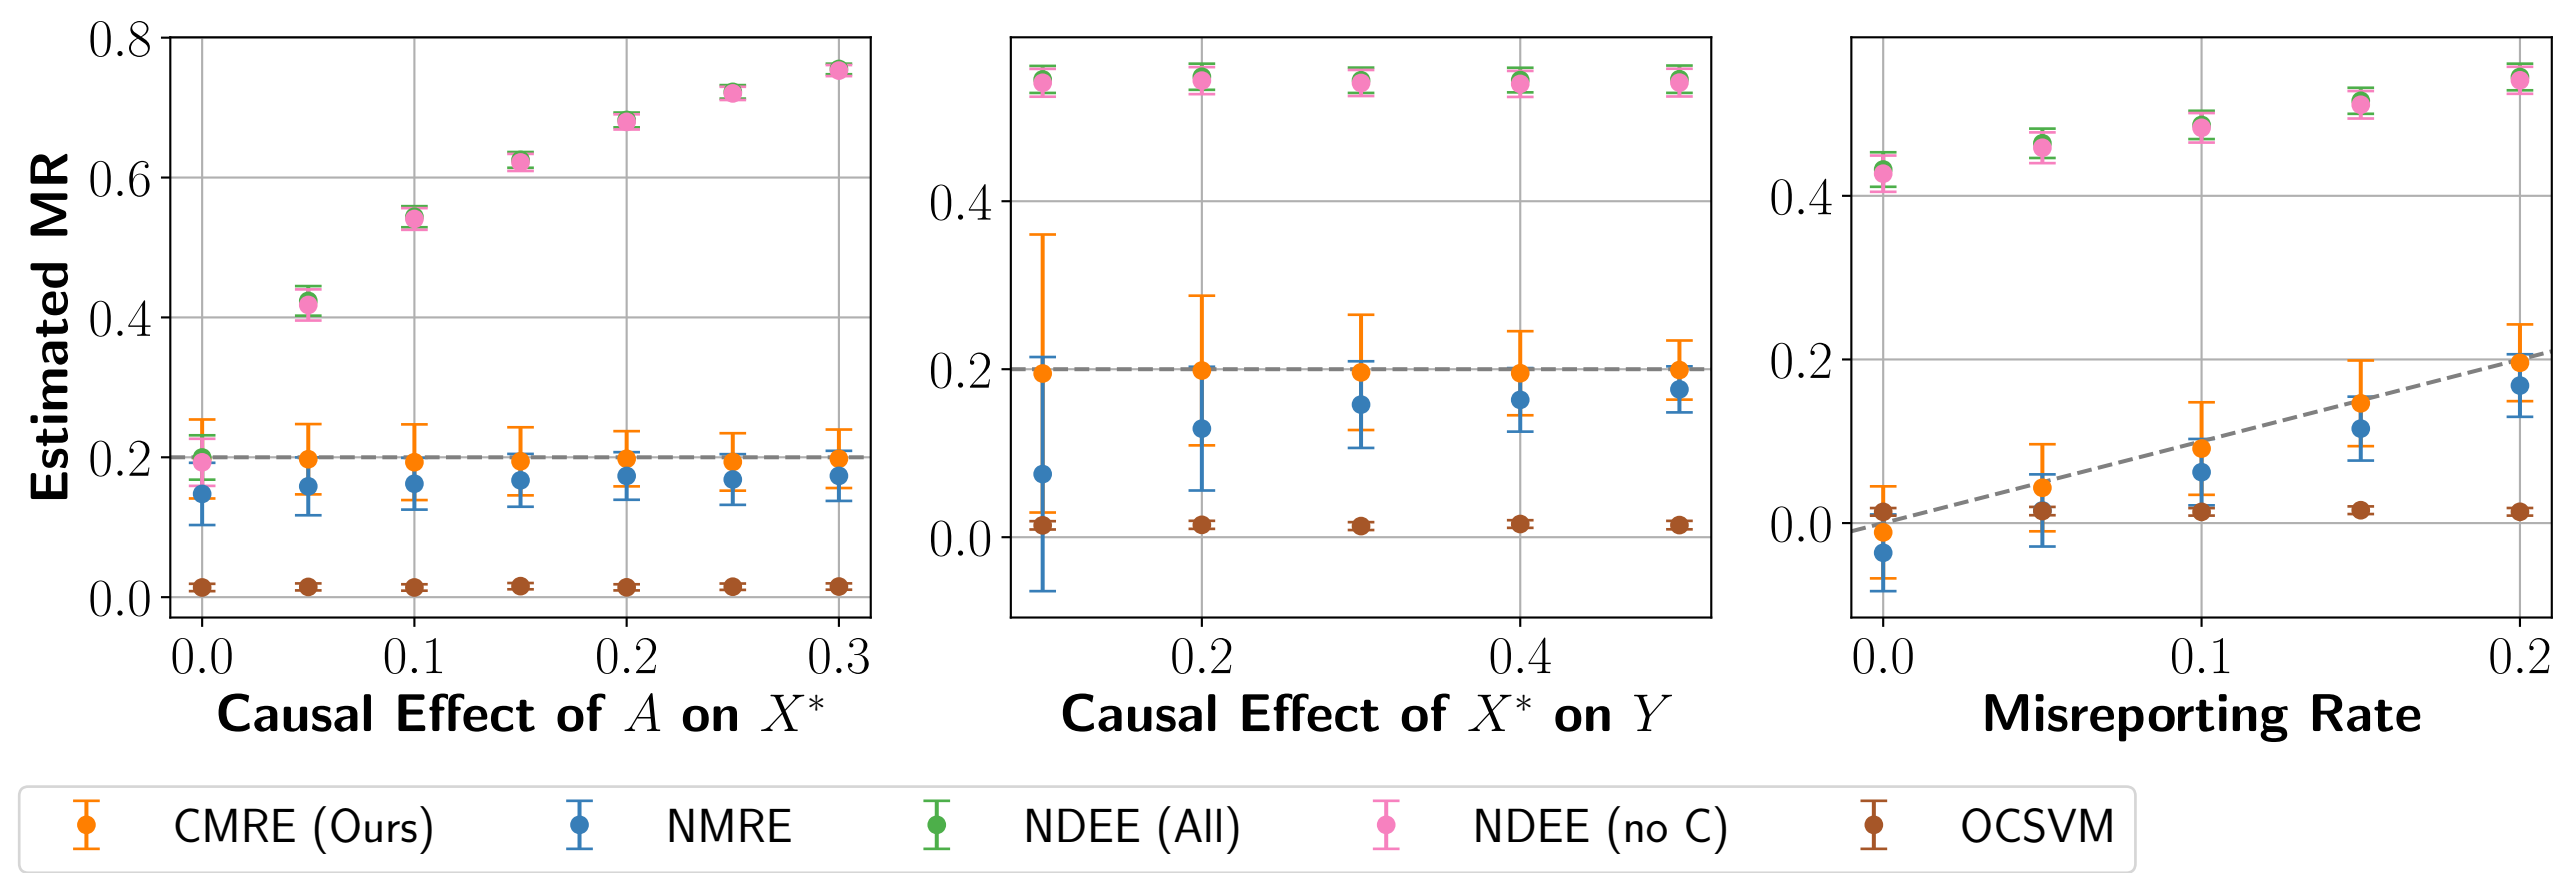

Supplement: supplementary_material [file simulation_4_appendix_plot.pdf › results/results_experiment_4/simulation_4_appendix_plot.pdf]

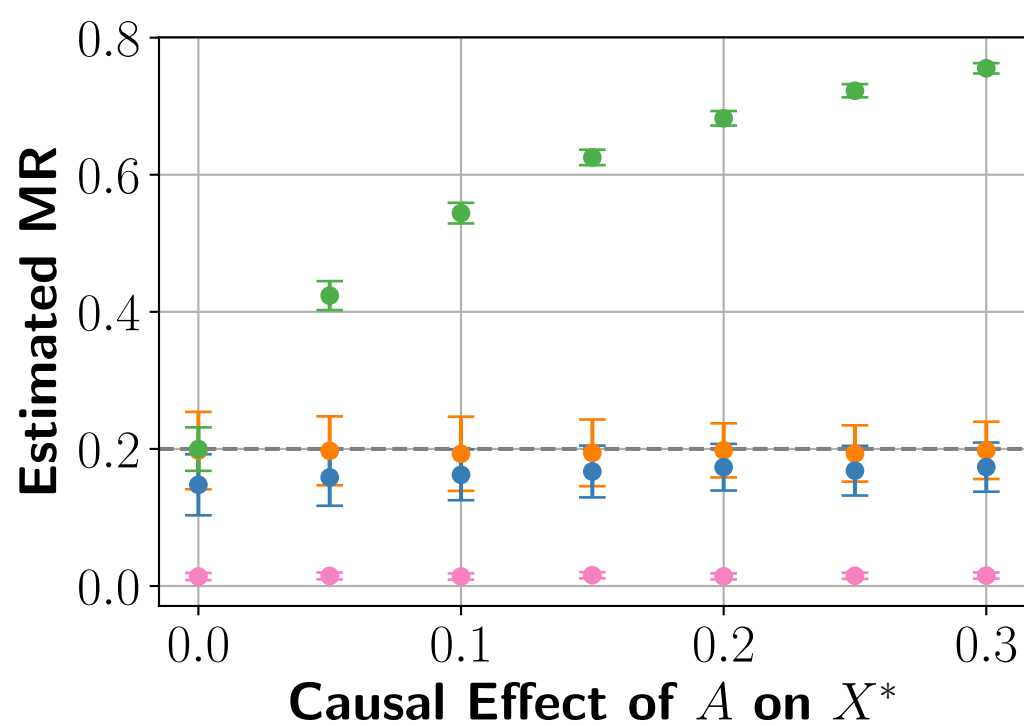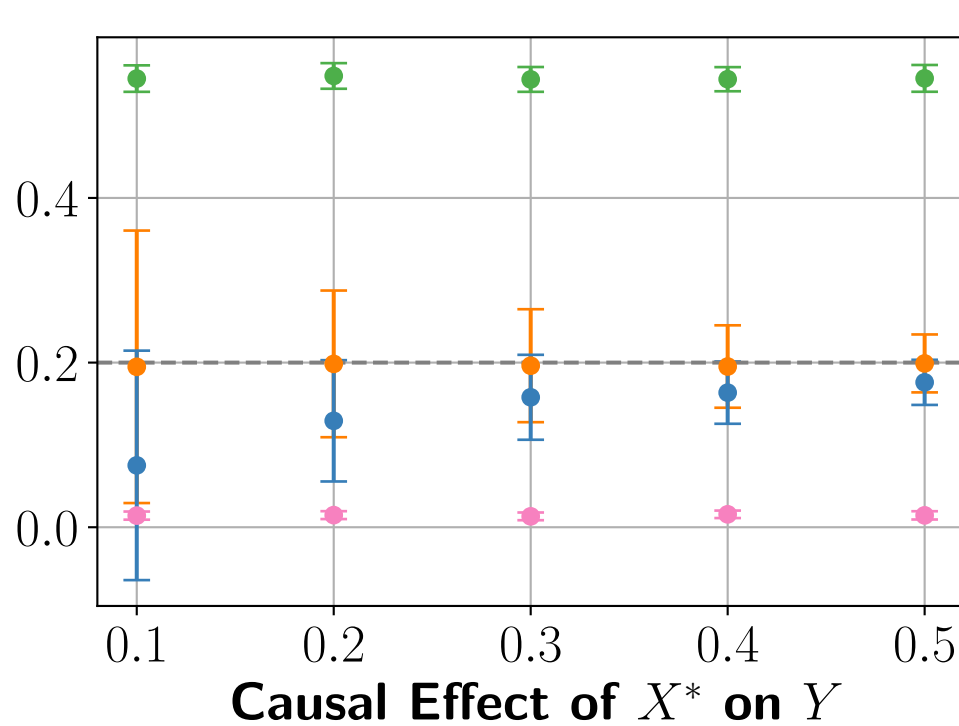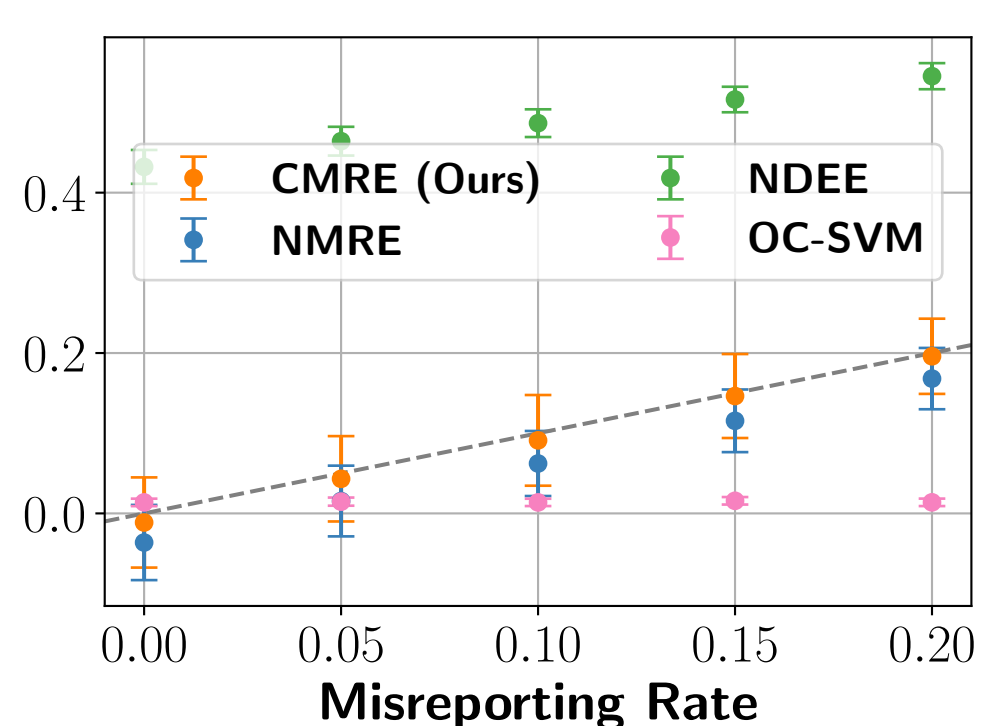

Supplement: supplementary_material [file simulation_4_main_plot.pdf › results/results_experiment_4/simulation_4_main_plot.pdf]

Estimated MR

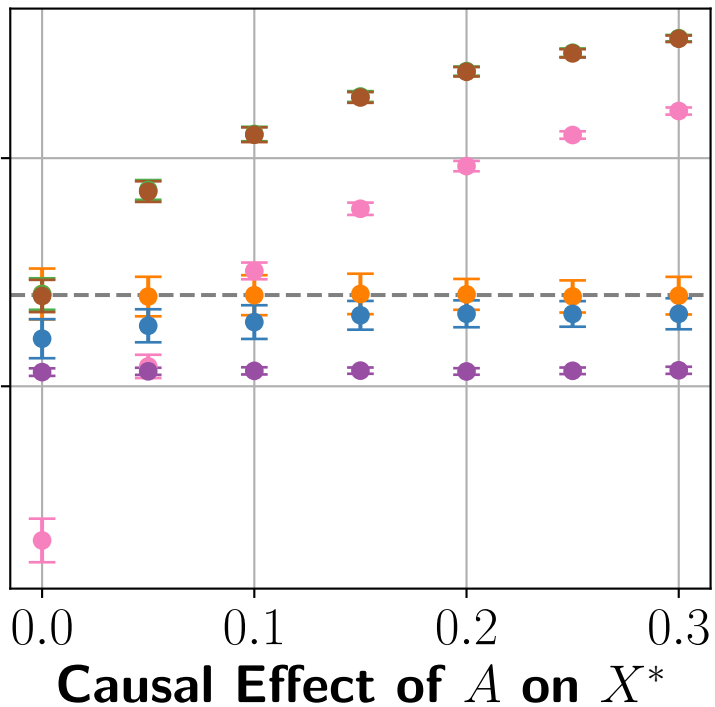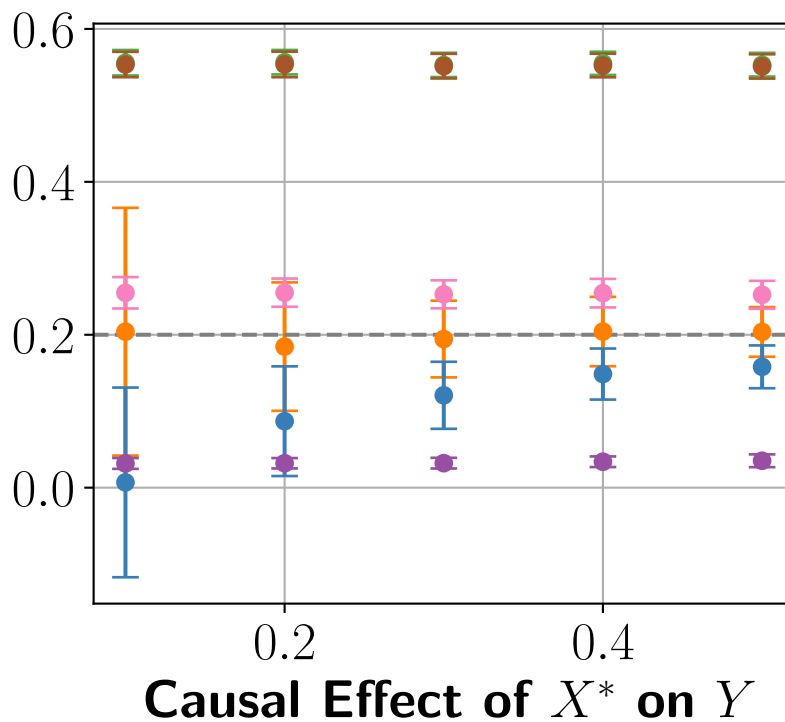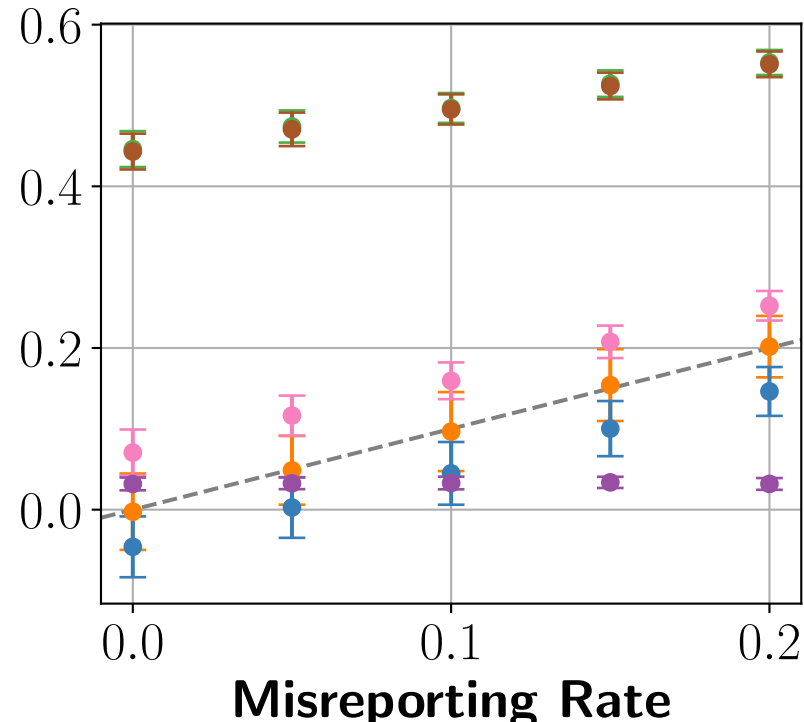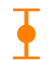

CMRE (Ours)

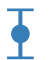

NMRE

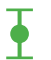

NDEE (All)

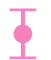

NDEE (no S)

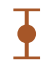

NDEE (no C)

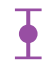

OCSVM

Supplement: supplementary_material [file simulation_5_appendix_plot.pdf › results/results_experiment_5/simulation_5_appendix_plot.pdf]

Estimated MR

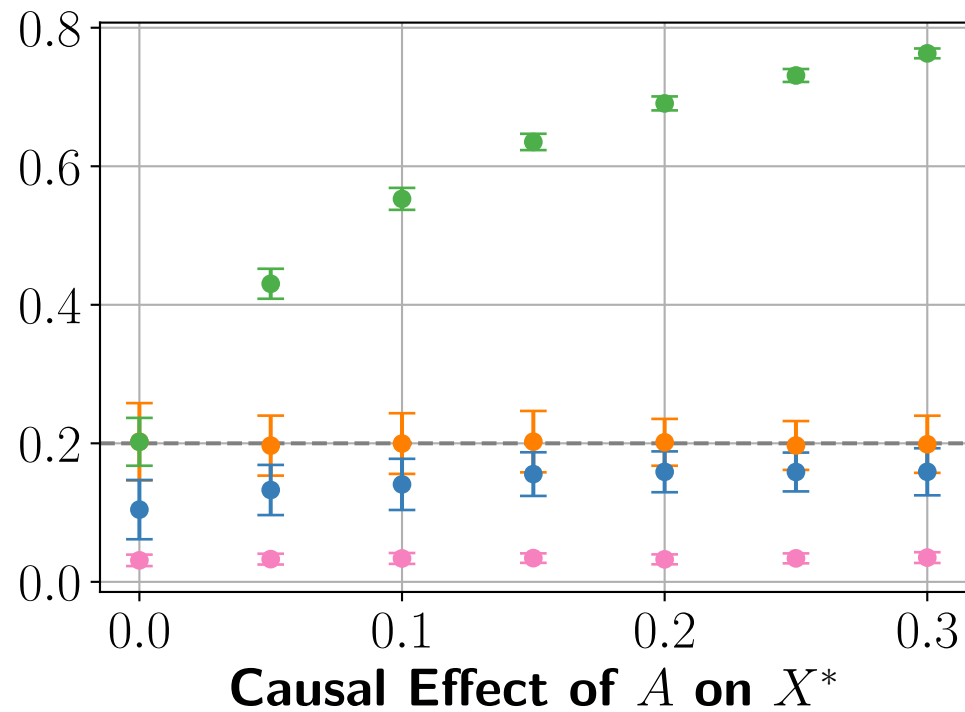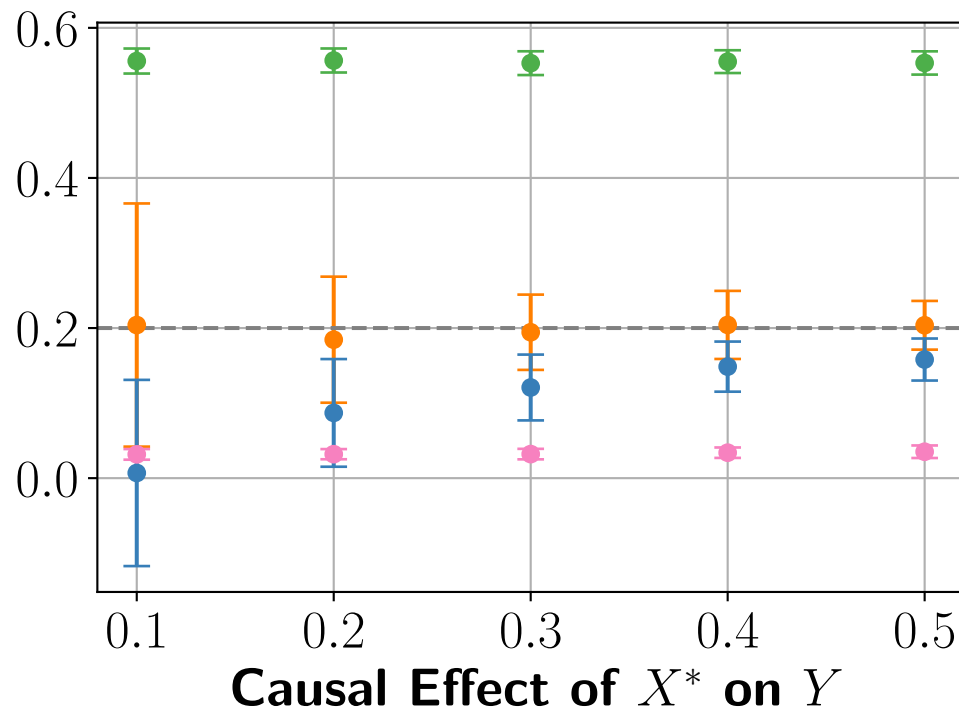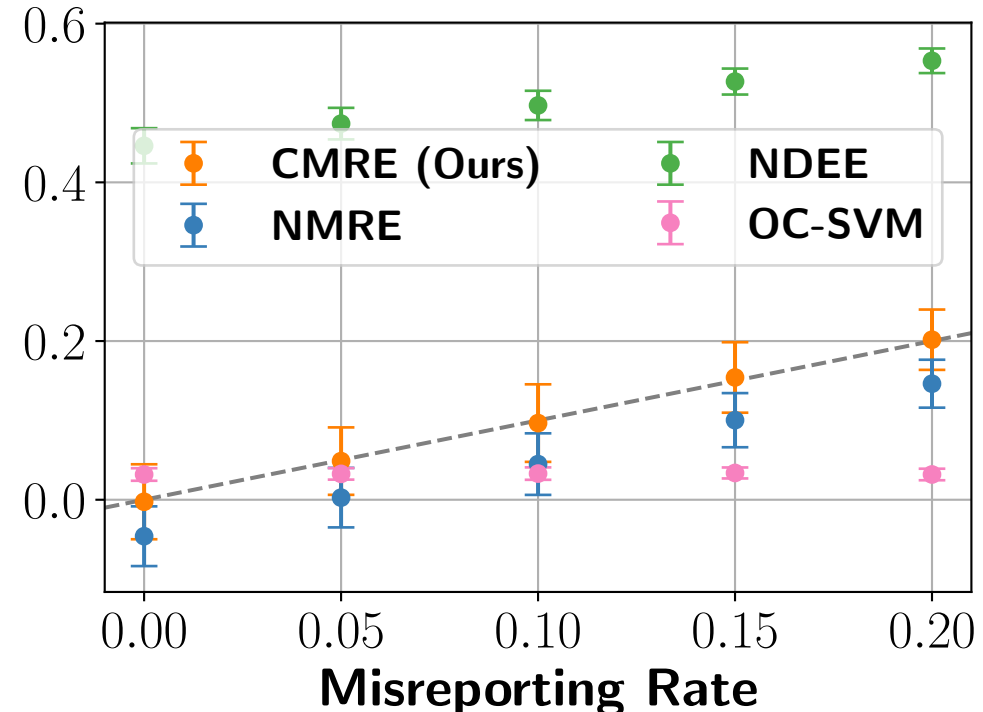

Supplement: supplementary_material [file simulation_5_main_plot.pdf › results/results_experiment_5/simulation_5_main_plot.pdf]
